# Supplementary material for: Identification of Nepro, a gene required for the maintenance of neocortex neural progenitor cells downstream of Notch
Source: Oxford University Press journal article supplement (doi:10.1242/dev.039180), 2009-11-11
Supplement: dev039180tables2.pdf [file dev039180tables2.pdf]

## Table S2. Overview of screening

|                                                               |        |
|---------------------------------------------------------------|--------|
| ESTs derived from E9.5-E10.5 brain                            | 14933  |
| ESTs derived from E13.5-P15 brain                             | 301493 |
| Enriched EST clusters derived from E9.5-E10.5 brain*          | 139    |
| NLS-coding genes in the clusters                              | 43     |
| Unpublished genes among those containing NLS                  | 5      |
| Unpublished NLS-coding genes expressed by early cortical NPCs | 3      |

\*The genes expressed in the NPCs were examined by DDD ([http://www.ncbi.nlm.nih.gov/UniGene/info\\_ddd.shtml](http://www.ncbi.nlm.nih.gov/UniGene/info_ddd.shtml)).  
Amino acid sequence motifs were searched by PSORTII (<http://psort.ims.u-tokyo.ac.jp/form2.html>).
